# Supplementary material
Source: Springer Nature journal article supplement (https://www.springermedizin.de/resource/supplementary/12936_2013_3707_MOESM5_ESM.pdf/9545166)
Supplement: MOESM5 [file 9545166]

**Table 1 - Results from individual infected mice included in the *in vivo* parasite invasion assay.**

| Mouse                          | Biotin label | Atto633 label | 30 minutes after transfusion |                    |                     |                                | 3 hours after transfusion |                    |                     |                                |
|--------------------------------|--------------|---------------|------------------------------|--------------------|---------------------|--------------------------------|---------------------------|--------------------|---------------------|--------------------------------|
|                                |              |               | Endogenous parasitemia*      | Biotin parasitemia | Atto633 parasitemia | Parasitemia ratio <sup>#</sup> | Endogenous parasitemia*   | Biotin parasitemia | Atto633 parasitemia | Parasitemia ratio <sup>#</sup> |
| <b>Untreated vs. untreated</b> |              |               |                              |                    |                     |                                |                           |                    |                     |                                |
| 1                              | Untreated    | Untreated     | 8.20%                        | 0.50%              | 0.50%               | 1.02                           | 8.60%                     | 0.80%              | 0.80%               | 1                              |
| 2                              | Untreated    | Untreated     | 25.10%                       | 1.30%              | 1.30%               | 0.99                           | 27.00%                    | 3.80%              | 3.80%               | 1                              |
| 3                              | Untreated    | Untreated     | 42.40%                       | 4.30%              | 4.40%               | 0.98                           | 45.80%                    | 12.90%             | 13.30%              | 0.97                           |
| 4                              | Untreated    | Untreated     | 2.80%                        | 0.40%              | 0.40%               | 1                              | 3.10%                     | 0.50%              | 0.50%               | 0.94                           |
| 5                              | Untreated    | Untreated     | 8.30%                        | 0.80%              | 0.90%               | 1.1                            | 9.50%                     | 1.70%              | 1.70%               | 1.03                           |
| <b>Treated vs. untreated</b>   |              |               |                              |                    |                     |                                |                           |                    |                     |                                |
| 1                              | Treated      | Untreated     | 30.00%                       | 2.20%              | 4.10%               | 0.54                           | 32.00%                    | 4.50%              | 8.30%               | 0.54                           |
| 2                              | Treated      | Untreated     | 15.40%                       | 3.10%              | 4.50%               | 0.68                           | 20.00%                    | 5.60%              | 10.00%              | 0.56                           |
| 3                              | Treated      | Untreated     | 15.80%                       | 3.20%              | 4.90%               | 0.64                           | 19.90%                    | 4.80%              | 11.40%              | 0.42                           |
| 4                              | Untreated    | Treated       | 18.70%                       | 4.30%              | 2.90%               | 0.68                           | 23.40%                    | 8.80%              | 5.20%               | 0.59                           |
| 5                              | Untreated    | Treated       | 21.50%                       | 4.00%              | 2.70%               | 0.66                           | 27.20%                    | 8.20%              | 4.60%               | 0.56                           |
| 6                              | Untreated    | Treated       | 25.70%                       | 3.20%              | 2.40%               | 0.76                           | 29.20%                    | 6.20%              | 4.10%               | 0.66                           |

\* Endogenous parasitemia is the parasitemia of unlabeled RBCs in each mouse.

<sup>#</sup> Parasitemia ratio is treated parasitemia divided by untreated parasitemia
